# Supplementary material for: Conditional mutagenesis by oligonucleotide-mediated integration of loxP sites in zebrafish
Source: PubMed Central journal article supplement (PMC6261631; doi:10.1371/journal.pgen.1007754), 2018-11-14
Supplement: pgen.1007754.s001.pdf [file pgen.1007754.s001.pdf]

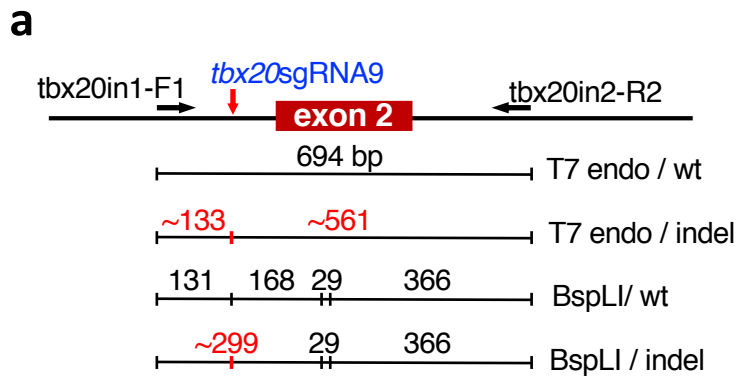

**b**

GGnnCC BspLI site  
 ...CATTTGCATGCTATGGCCCCACAGGTTTTTTTTTTTCTA...  
 ↑

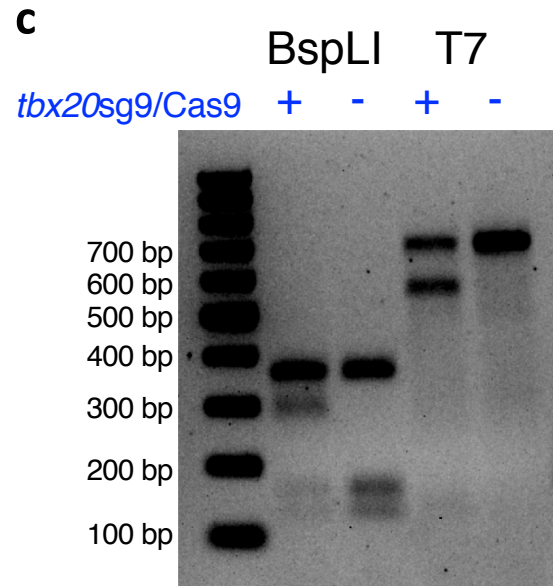

**Supplementary Figure 1. Assessment of guide RNA activity by T7 endonuclease assay and by loss of a restriction enzyme site.** **a.** Diagram of the *tbx20* locus around *tbx20sgRNA9* cut site. Underneath, expected fragment sizes after digestion of T7 endonuclease or BspLI restriction endonuclease. **b.** The BspLI restriction enzyme site overlaps the expected double strand break site, indicating that almost all indels will result in loss of BspLI site. **c.** Gel electrophoresis of PCR fragments digested with T7 Endonuclease or BspLI restriction endonuclease.
