# Supplementary material for: Conditional mutagenesis by oligonucleotide-mediated integration of loxP sites in zebrafish
Source: PubMed Central journal article supplement (PMC6261631; doi:10.1371/journal.pgen.1007754), 2018-11-14
Supplement: pgen.1007754.s003.pdf [file pgen.1007754.s003.pdf]

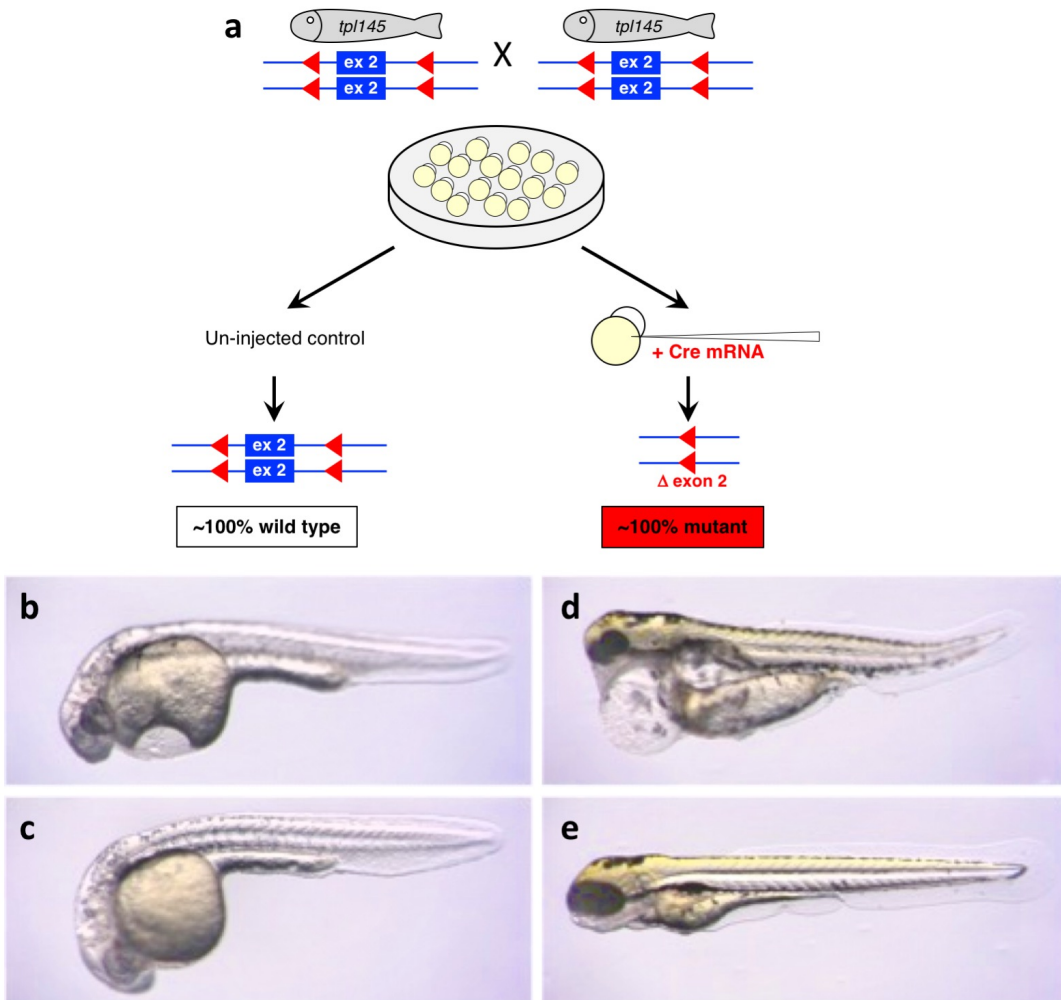

**Supplementary Figure 3. Generation of “all-mutant” clutches of embryos.** **a.** Experimental design. Fish homozygous for the floxed allele are incrossed, and half the embryos are injected with Cre mRNA. **b-e.** Representative images of Cre-injected (**b,d**) and un-injected siblings (**c,e**) at 1 dpf (**b,c**) and 3 dpf (**d,e**).
