# Supplementary material for: Conditional mutagenesis by oligonucleotide-mediated integration of loxP sites in zebrafish
Source: PubMed Central journal article supplement (PMC6261631; doi:10.1371/journal.pgen.1007754), 2018-11-14
Supplement: pgen.1007754.s004.pdf [file pgen.1007754.s004.pdf]

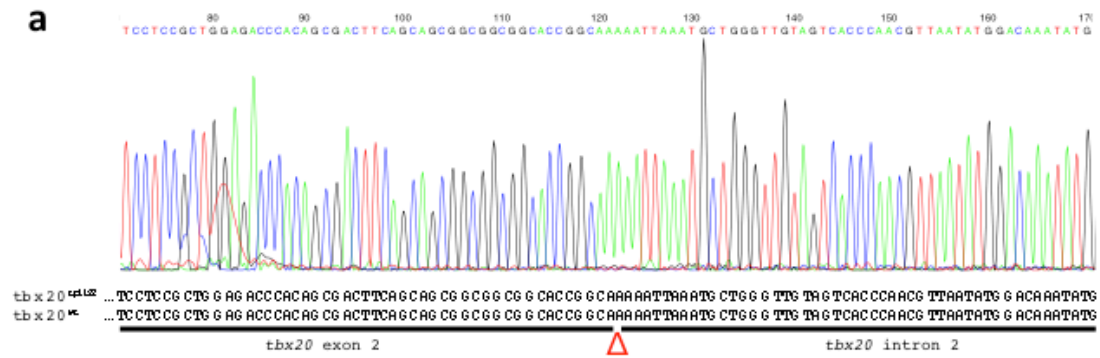

**Supplementary Figure 4. Sequence of *tbx20*<sup>tp112</sup> partial deletion allele.** *tp112* contains a 241 bp deletion removing most of exon 2 and part of intron 2. *tp112* homozygotes display a consistent and strong *tbx20* phenotype.
