# Supplementary material for: Conditional mutagenesis by oligonucleotide-mediated integration of loxP sites in zebrafish
Source: PubMed Central journal article supplement (PMC6261631; doi:10.1371/journal.pgen.1007754), 2018-11-14
Supplement: pgen.1007754.s005.pdf [file pgen.1007754.s005.pdf]

**a**

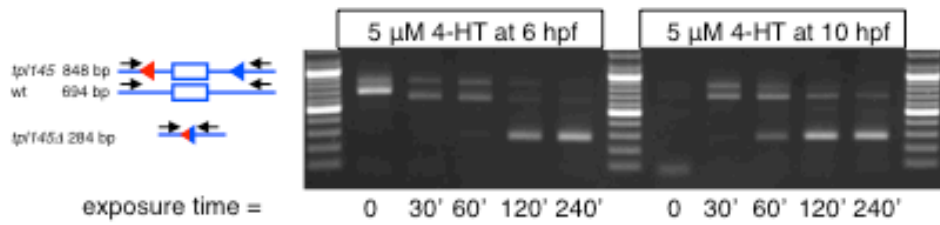

**Supplementary Figure 5. Time course of excision after 4-HT exposure. a.** Embryos were treated with 5  $\mu$ M 4-HT at either 6 hpf or 10 hpf. Embryos were pooled (n=20) and collected at 30, 60, 120, and 240 minutes after exposure. 0 indicates a pool of siblings not exposed to 4-HT. Note: 6 hpf and 10 hpf not treated control PCRs were performed on the same DNA sample.
