# Supplementary material for: Conditional mutagenesis by oligonucleotide-mediated integration of loxP sites in zebrafish
Source: PubMed Central journal article supplement (PMC6261631; doi:10.1371/journal.pgen.1007754), 2018-11-14
Supplement: pgen.1007754.s006.pdf [file pgen.1007754.s006.pdf]

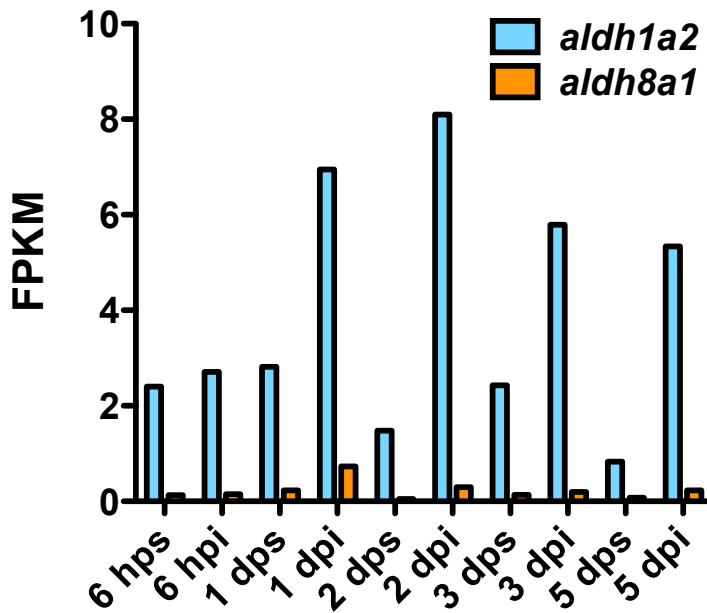

**Supplementary Figure 6. Expression on RA-synthesizing enzymes in response to heart injury.** Expression of retinoic acid synthesizing genes (*aldh1a2* and *aldh8a1*) in adult zebrafish hearts at various time points post sham operation or cardiac injury in fragments per kilobase of transcript per million mapped reads (FPKM). *aldh1a2* was highly upregulated in response to injury. *aldh1a3* was not detectable at any tested time point. hps, hours post sham injury, hpi, hours post injury, dps, days post sham injury, dpi, days post injury.
