# Supplementary material for: Conditional mutagenesis by oligonucleotide-mediated integration of loxP sites in zebrafish
Source: PubMed Central journal article supplement (PMC6261631; doi:10.1371/journal.pgen.1007754), 2018-11-14
Supplement: pgen.1007754.s008.pdf [file pgen.1007754.s008.pdf]

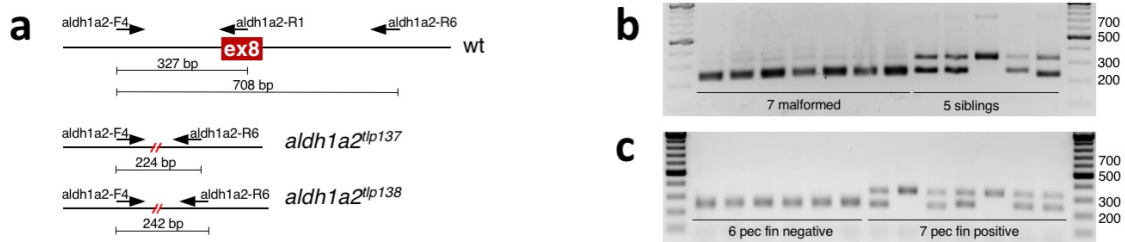

**Supplementary Figure 8. Three-primer genotyping of malformed embryos and normal siblings indicates linkage of the phenotype to *aldh1a2* exon 8 deletion. a.** diagram of the locus. **b.** genotyping of 3 dpf embryos displaying heart and pectoral fin defects. **c.** genotyping of embryos after *in situ* hybridization for *tbx18*. All 6 embryos lacking *tbx18* expression in the pectoral fin buds were homozygous for the exon 8 deletion. All siblings that were positive for *tbx18* in the pectoral fin buds were either heterozygous or homozygous wild type.
