# Supplementary material for: Conditional mutagenesis by oligonucleotide-mediated integration of loxP sites in zebrafish
Source: PubMed Central journal article supplement (PMC6261631; doi:10.1371/journal.pgen.1007754), 2018-11-14
Supplement: pgen.1007754.s011.pdf [file pgen.1007754.s011.pdf]

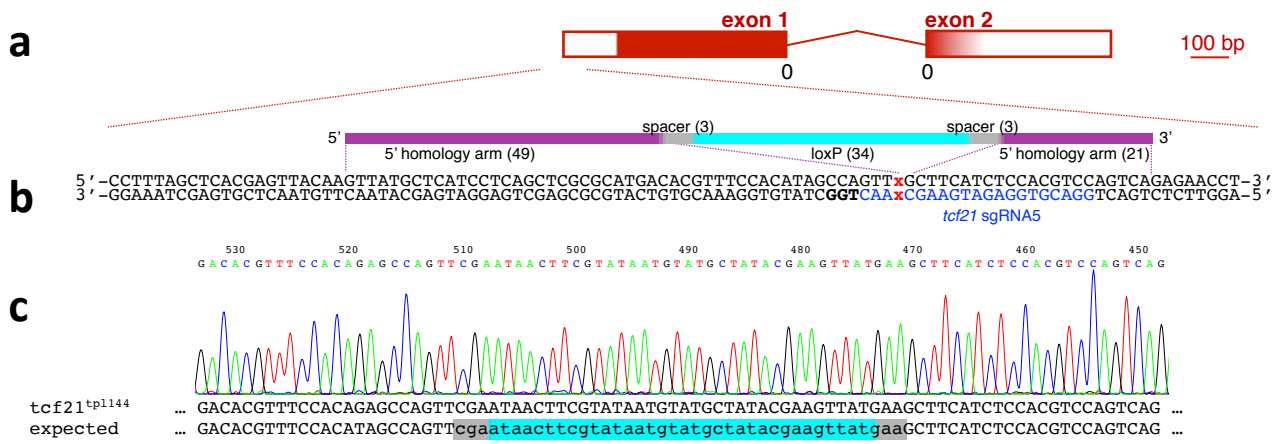

**Supplementary Figure 11. Integration of loxP site into 5' UTR of *tcf21*.** **a.** Diagram of the *tcf21* locus. Both exons and the intron are drawn to scale. Reading frame phase is indicated below each intron-exon junction. **b.** *tcf21* sgRNA5 target site in the 5' UTR and HDR oligonucleotide used to knock in the loxP site. **c.** Sequence of the recovered *tcf21*<sup>tp1144</sup> loxP-containing allele. Single nucleotide substitution within the 5' homology arm is highlighted in bold red.
