# Supplementary material for: Conditional mutagenesis by oligonucleotide-mediated integration of loxP sites in zebrafish
Source: PubMed Central journal article supplement (PMC6261631; doi:10.1371/journal.pgen.1007754), 2018-11-14
Supplement: pgen.1007754.s014.pdf [file pgen.1007754.s014.pdf]

| Target                  | HDR oligo design  | Germline transmission | Germline mosaicism | Allele description | Line designation |
|-------------------------|-------------------|-----------------------|--------------------|--------------------|------------------|
| <i>tbx20</i> intron 2   | 21-3-loxP-3-21 S  | 1 / 24                | 4 / 16 adult F1    | +10                | <i>tpl135</i>    |
| <i>tbx20</i> intron 1   | 62-3-loxP-3-18 AS | 1 / 6                 | 3 / 16 adult F1    | Precise            | <i>tpl136</i>    |
| <i>tbx20</i> intron 1   | 62-3-loxP-3-18 AS | 1 / 42*               | 4 / 8 adult F1     | +62                | <i>tpl145</i>    |
| <i>fleer</i> intron 7   | 49-3-loxP-3-21 AS | 1 / 14                | 1 / 21 adult F1    | Precise            | <i>tpl141</i>    |
| <i>aldh1a2</i> intron 7 |                   | 5 / 14                | 3 / 14 adult F1    | Precise            | <i>tpl139</i>    |
|                         |                   |                       | 6 / 16 adult F1    | 1 SNP              | <i>tpl140</i>    |
|                         |                   |                       | nd                 | -3 +20             | -                |
|                         |                   |                       | 4 / 24 @5 dpf      | +46                | -                |
|                         |                   |                       | 5 / 8 @5 dpf       | +19                | -                |
| <i>tcf21</i> 5' UTR     | 49-3-loxP-3-21 AS | 1 / 18                | 4 / 24 adult       | Precise            | <i>tpl144</i>    |

**Supplementary Table 3. Germline transmission of loxP integrations.** In HDR oligo design column, oligonucleotides are diagrammed 5' to 3', with homology arms in magenta, spacers in grey and loxP sites in aqua. S indicates oligonucleotides sense to PAM, AS indicates antisense to PAM. \* indicates that HDR oligonucleotide template did not match the target site perfectly but had one-nucleotide indel, likely leading to lower germline transmission rates.
