# Supplementary material for: Conditional mutagenesis by oligonucleotide-mediated integration of loxP sites in zebrafish
Source: PubMed Central journal article supplement (PMC6261631; doi:10.1371/journal.pgen.1007754), 2018-11-14
Supplement: pgen.1007754.s015.pdf [file pgen.1007754.s015.pdf]

**Supplementary Table 4. Sequences of primers used in this study.** loxP sites are highlighted in blue and spacers highlighted in grey. sgRNA target site sequences are highlighted in yellow, with the additional G added for T7 transcription shown in bold red. In HDR primers, the loxP site is highlighted in aqua and the spacer sequence is highlighted in grey.

| Primer                                                                        | Sequence 5' to 3'                                                                                                                              |
|-------------------------------------------------------------------------------|------------------------------------------------------------------------------------------------------------------------------------------------|
| <b>universal primers for sgRNA synthesis</b> (from Burg <i>et al.</i> , 2016) |                                                                                                                                                |
| sgT7                                                                          | GCTAGCTAATACGACTCACT                                                                                                                           |
| sgRNA-R                                                                       | AAAAGCACCGACTCGGTG                                                                                                                             |
| M13F                                                                          | GTAAAACGACGGCCAGT                                                                                                                              |
| <b>gene specific primers for sgRNA synthesis</b>                              |                                                                                                                                                |
| <i>tbx20</i> sgRNA9                                                           | CGCTAGCTAATACGACTCACTATA <b>gttgcatgctatggccccac</b><br>GTTTTAGAGCTAGAAATAG                                                                    |
| <i>tbx20</i> sgRNA10                                                          | CGCTAGCTAATACGACTCACTATA <b>gttgtcacccaacgttaata</b><br>GTTTTAGAGCTAGAAATAG                                                                    |
| <i>flr</i> sgRNA3<br>(gBlock, IDT)                                            | ccGCTAGCTAATACGACTCACTATA <b>gggttcataagaagagtctg</b><br>GTTTTAGAGCTAGAAATAGCAAGTTAAAATAAGGCTAGTCCGTTA<br>TCAACTTGAAAAAGTGGCACCGAGTCGGTGCCTTT  |
| <i>aldh1a2</i> sgRNA1                                                         | CGCTAGCTAATACGACTCACTATA <b>gatgtgggctgaagctcag</b><br>GTTTTAGAGCTAGAAATAG                                                                     |
| <i>aldh1a2</i> sgRNA2                                                         | CGCTAGCTAATACGACTCACTATA <b>gtaggggtagaatgctggtg</b><br>GTTTTAGAGCTAGAAATAG                                                                    |
| <i>aldh1a2</i> sgRNA3                                                         | CGCTAGCTAATACGACTCACTATA <b>ggtgagataacagacacct</b><br>GTTTTAGAGCTAGAAATAG                                                                     |
| <i>aldh1a2</i> sgRNA4                                                         | CGCTAGCTAATACGACTCACTATA <b>gacgtgcgcttggttgggt</b><br>GTTTTAGAGCTAGAAATAG                                                                     |
| <i>pcf21</i> sgRNA5                                                           | CGCTAGCTAATACGACTCACTATA <b>ggacgtggagatgaagcaac</b><br>GTTTTAGAGCTAGAAATAG                                                                    |
| <i>pcf21</i> sgRNA6                                                           | CGCTAGCTAATACGACTCACTATA <b>ggtggagaaaaggacttcttg</b><br>GTTTTAGAGCTAGAAATAG                                                                   |
| <b>gene specific loxP HDR oligos</b>                                          |                                                                                                                                                |
| <i>tbx20</i> sg10-loxP-F1                                                     | GGTTGTTGTCACCCAACGTTAgga <b>ataacttcgtatagcatacat</b><br><b>tatacgaagttattgc</b> ATATGGACAAATATGGATAAA                                         |
| <i>tbx20</i> sg9-loxP-103                                                     | CAATAACCATGATTATGTGCGCATAAATGTGATGCAGTTTGT<br>AGAAAAAAAAAACCTGTG <b>cacataacttcgtataatgtatgctata</b><br><b>cgaagttattcc</b> GGGCCATAGCATGCAAAT |
| <i>flr</i> up3-loxP-HDR3                                                      | AGAAGTTGCATTTAAATCAAATGCATAAACGAATCCTCGAAGGCC<br>ACAG <b>ctgataacttcgtatagcatacattatacgaagttattgtA</b><br>CTCTTCTTATGAACCTGTTT                 |
| <i>aldh1a2</i> sg1loxP-hdrL                                                   | TCGTCCCCTGCTCTTTGACTGGACAACCAGCAGCATTATCAGaCC<br>CCTG <b>cagataacttcgtataatgtatgctatacgaagttattcaA</b><br>GCTTCAGCCCACATCTTAAA                 |
| <i>pcf21</i> sg5loxP-HDR1                                                     | GTTATGCTCATCCTCAGCTCGCGCATGACACGTTTCCACATAGCC<br>AGTT <b>cgaataacttcgtataatgtatgctatacgaagttattgaaG</b>                                        |

|                                                                            |                            |
|----------------------------------------------------------------------------|----------------------------|
|                                                                            | CTTCATCTCCACGTCCAGTC       |
| <b>Tol2 (gene trap) – specific</b> (from Balciuniene <i>et al.</i> , 2013) |                            |
| Tol2-F8                                                                    | CTCAAGTAAGATTCATAGCCAGATAC |
| Tol2-R7                                                                    | CTGGCTAGAATCTTACTTGAGTAA   |
| <b>loxP – specific</b>                                                     |                            |
| loxP-U1                                                                    | TATAATGTATGCTATACGAAGTTAT  |
| loxP-U2                                                                    | TATAGCATAACATTATACGAAGTTAT |
| loxP-F1                                                                    | TCGTATAATGTATGCTATACGAAGT  |
| loxP-R1                                                                    | ATAACTTCGTATAGCATAACATTATA |
| loxP-Rev                                                                   | CGTATAATGTATGCTATACG       |
| <b>tbx20 – specific</b>                                                    |                            |
| tbx20in1-F1                                                                | CAGTAGCCTAATATTTCAACGTTTC  |
| tbx20in1-F2                                                                | GTTTCTATGGCCTATGTTATTGTGA  |
| tbx20in1-F4                                                                | TGTAAAGACTGATGTAGTATGTAGT  |
| tbx20in2-R1                                                                | GTGTTGACAGAAATAGGTTACACTC  |
| tbx20in2-R2                                                                | GTAAGCTTGTGAGATTGTGTTGGAC  |
| tbx20ex2-F1                                                                | AAATGATTATTACAAAGTCTGGAAG  |
| tbx20ex2-R1                                                                | ACGACTTTTCCACGAATTGTTCTTG  |
| <b>flier – specific</b>                                                    |                            |
| flrUTR-F1                                                                  | GCGTCATGTATTGATTACGTCACT   |
| flrEx7-F1                                                                  | TCATCCTGCACGAGACTGCT       |
| flrEx7-F2                                                                  | TAATCTGAAAGCAGCTATTGAATAC  |
| flrIn7-R1                                                                  | TTGCAATGTTTCCACTGACCAA     |
| flrIn7-R2                                                                  | AACATGAGACAGAGTGATGTTAAG   |
| flrIn7-R4                                                                  | TAGACTGCACACAGGCAGACTTGAT  |
| <b>aldh1a2 – specific</b>                                                  |                            |
| aldh1a2-F1                                                                 | TGCACTGTTAAACAGCGCGTAAGAC  |
| aldh1a2-F2                                                                 | AAGCTGATCCAAGAAGCAGCAGGAA  |
| aldh1a2-F3                                                                 | TAACATTAGGCAGGCAGAAGAGTAG  |
| aldh1a2-F4                                                                 | TGACAGCGTCGAGCATCCTACACAA  |
| aldh1a2-F5                                                                 | GTTGTAATCGCACATCGGCA       |
| aldh1a2-R1                                                                 | CTCCAGCGTGACTCTCTTCAGATT   |
| aldh1a2-R4                                                                 | AGTTTTGGAGCCATTGAATTCTGCT  |
| aldh1a2-R6                                                                 | AGCAGGCAGATTTACGGTTCTAGTG  |
| aldh1a2-R7                                                                 | CGGTGAGGGCATCAGATGGA       |
| <b>tcf21 – specific</b>                                                    |                            |
| tcf21-F1                                                                   | ACAAGTTATGCTCATCCTCAGCTCG  |
| tcf21-F9                                                                   | CTGCTAGCAACAGCATATCCATC    |
| tcf21-F10                                                                  | GACAAAACGCTCGAGTGCAATGAAT  |
| tcf21UTR-F1                                                                | CTCCACGTCCAGTCAGAGAACCTC   |

|                                |                           |
|--------------------------------|---------------------------|
| tcf21-R1                       | CATATTTGTCATTGGCGAGTATCTG |
| tcf21-R5                       | GCTTTGCTGAGCACGCGCATCCT   |
| tcf21UTR-R2                    | AACAAAGGCGCGTGACATGA      |
| <b><i>tbx18</i> – specific</b> |                           |
| tbx18UTR-F1                    | CGTTGACAGACCGATGAGACTGTT  |
| tbx18-R10                      | TGGAGTGCAGAATGATATGGCC    |
